# Supplementary material for: Integrated drug profiling and CRISPR screening identify BCR::ABL1-independent vulnerabilities in chronic myeloid leukemia
Source: PubMed Central journal article supplement — Cell Rep Med. 2024 Apr 22;5(5):101521. doi: 10.1016/j.xcrm.2024.101521 (PMC11148568; doi:10.1016/j.xcrm.2024.101521), 2024-04-22
Supplement: mmc1.pdf [file mmc1.pdf]

**Cell Reports Medicine, Volume 5**

**Supplemental information**

**Integrated drug profiling and CRISPR screening  
identify BCR::ABL1-independent vulnerabilities  
in chronic myeloid leukemia**

**Shady Adnan Awad, Olli Dufva, Jay Klievink, Ella Karjalainen, Aleksandr Ianevski, Paavo Pietarinen, Daehong Kim, Swapnil Potdar, Maija Wolf, Kourosh Lotfi, Tero Aittokallio, Krister Wennerberg, Kimmo Porkka, and Satu Mustjoki**

1 **Supplemental information:**

2

3 **Integrated drug profiling and CRISPR screening identify BCR::ABL1**  
4 **independent vulnerabilities in chronic myeloid leukemia**

5 Shady Adnan Awad, Olli Dufva, Jay Klievink, Ella Karjalainen, Aleksandr Ianevski, Paavo Pietarinen,  
6 Daehong Kim, Swapnil Potdar, Maija Wolf, Kouros Lotfi, Tero Aittokallio, Krister Wennerberg,  
7 Kimmo Porkka, Satu Mustjoki

8

9

10

11

12

13

14

15

16

17

18 **Supplementary Figure 1**

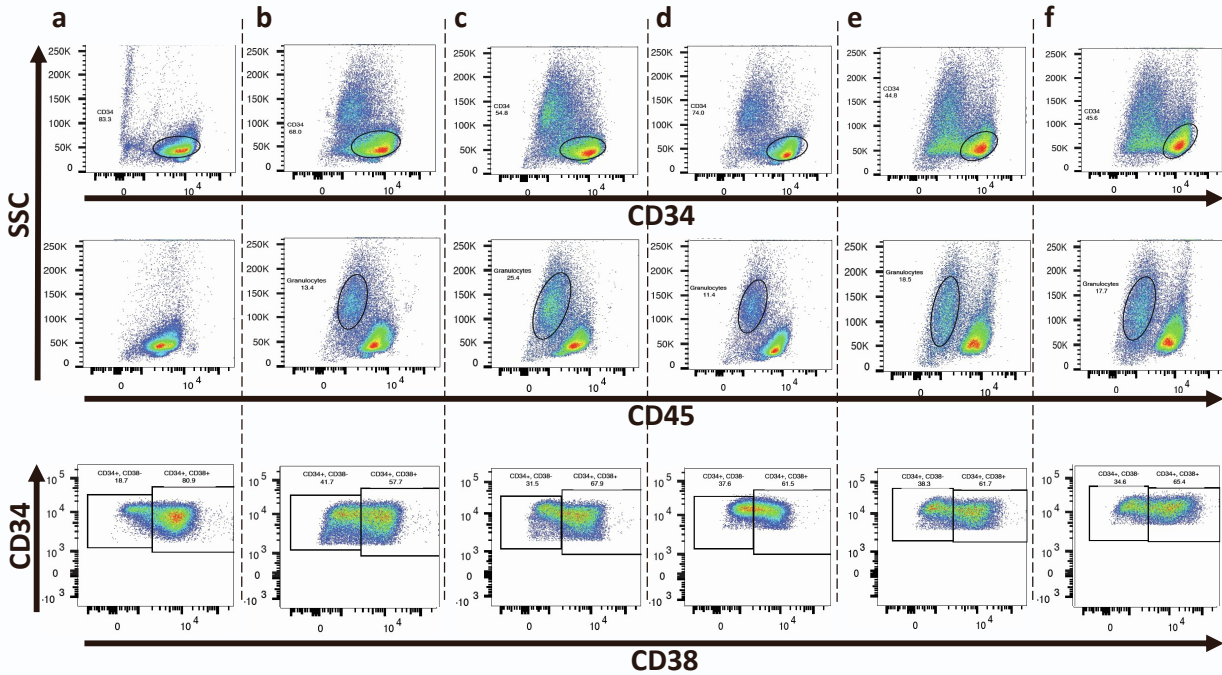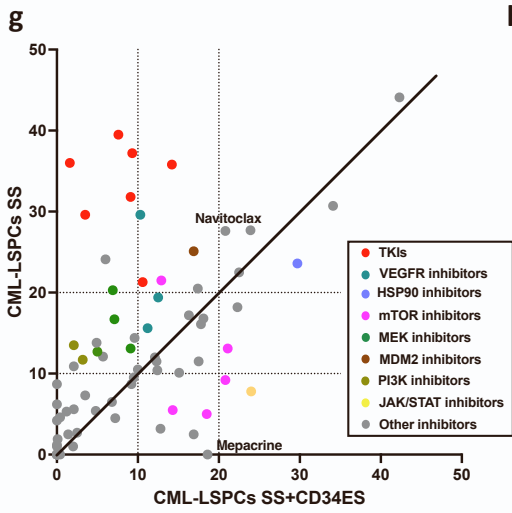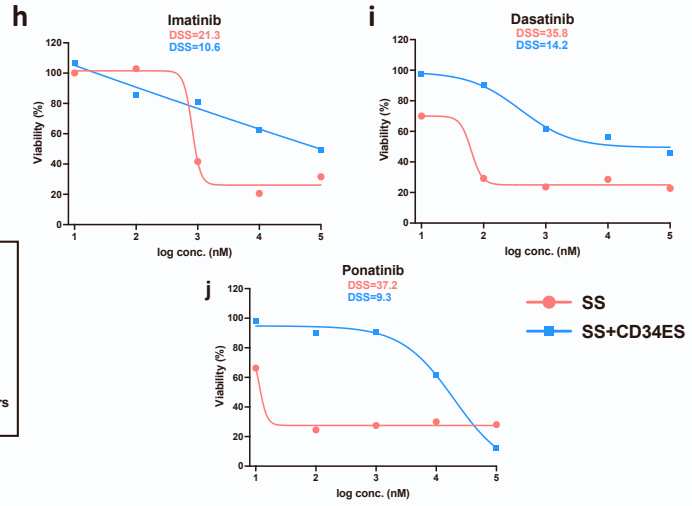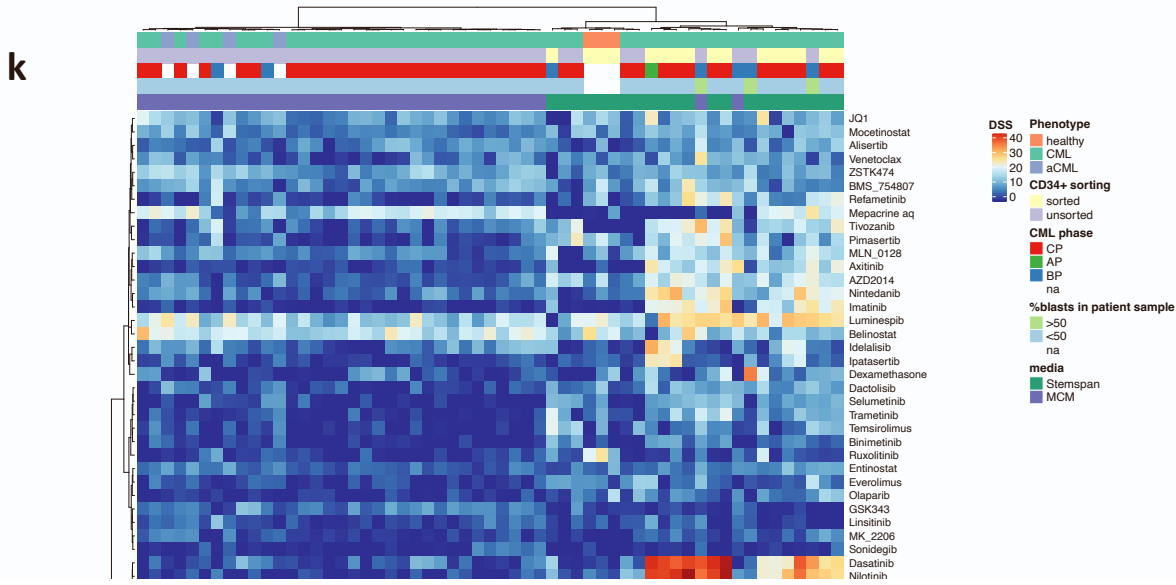

20 **Figure S1: Effect of culturing media composition and sorting status on the drug sensitivity profile of CML-LSPCs.**  
21 Related to Figure 1. Flowcytometry dot plot showing the expression of CD45, CD34 and CD38 markers on CD34+ sorted  
22 cells from a CP-CML bone marrow at a) basal, b) after 72 hours in StemSpan media, c) after 72 hours in StemSpan media  
23 supplemented by stemregenin1, d) after 72 hours in StemSpan media supplemented by stemregenin1 and UM729, e) after  
24 72 hours in StemSpan media supplemented by commercial CD34 expansion cocktail, f) after 72 hours in StemSpan media  
25 supplemented by commercial CD34 expansion cocktail, stemregenin1 and UM729. StemSpan media with no additional  
26 supplementation was selected for subsequent experiments, because it achieved the best balance between viability  
27 maintaining and minimizing differentiation. g) Correlation of drug sensitivity scores (DSS) of LSPCs cultured in stemspan  
28 media (SS) and stemspan media supplemented with CD34+ expansion cytokine cocktail (SS+CD34ES). Dose response  
29 curve comparing LSPCs response to h) imatinib, i) dasatinib, j) ponatinib, when cultured in SS media (red) versus  
30 SS+CD34ES (Blue). Viability is normalized and expressed as percentage of viability of cells in DMSO-treated wells. Our  
31 data shows that cytokine supplements that support LSCs ex vivo expansion can also push cells to differentiate, activate  
32 several BCR-ABL independent pathways, and affect DSRT profiles even when initially use CD34+ sorted samples.  
33 Cytokine-induced differentiation was associated with the loss of sensitivity to TKIs and other functional classes such as  
34 VEGFR and AKT inhibitors, with increased activity of some mTOR and JAK inhibitors. k) Heatmap of DSS scores of 39  
35 drugs from 57 samples, including 50 CML, 4 atypical CML (Philadelphia negative) and 3 healthy donors. Ex-vivo DSRT  
36 experiments were done using either stemspan (SS) or mononuclear cell media (MCM). A subset of CML samples was  
37 sorted for CD34+ cells. Part of this data (unsorted CML data) was previously published.(1) Explanatory tracks from above  
38 are disease status, sorting status, CML phase, blast percentage in the initial sample (prior to processing/sorting), and media  
39 used in the experiments.  
40  
41

42 **Supplementary Figure 2**

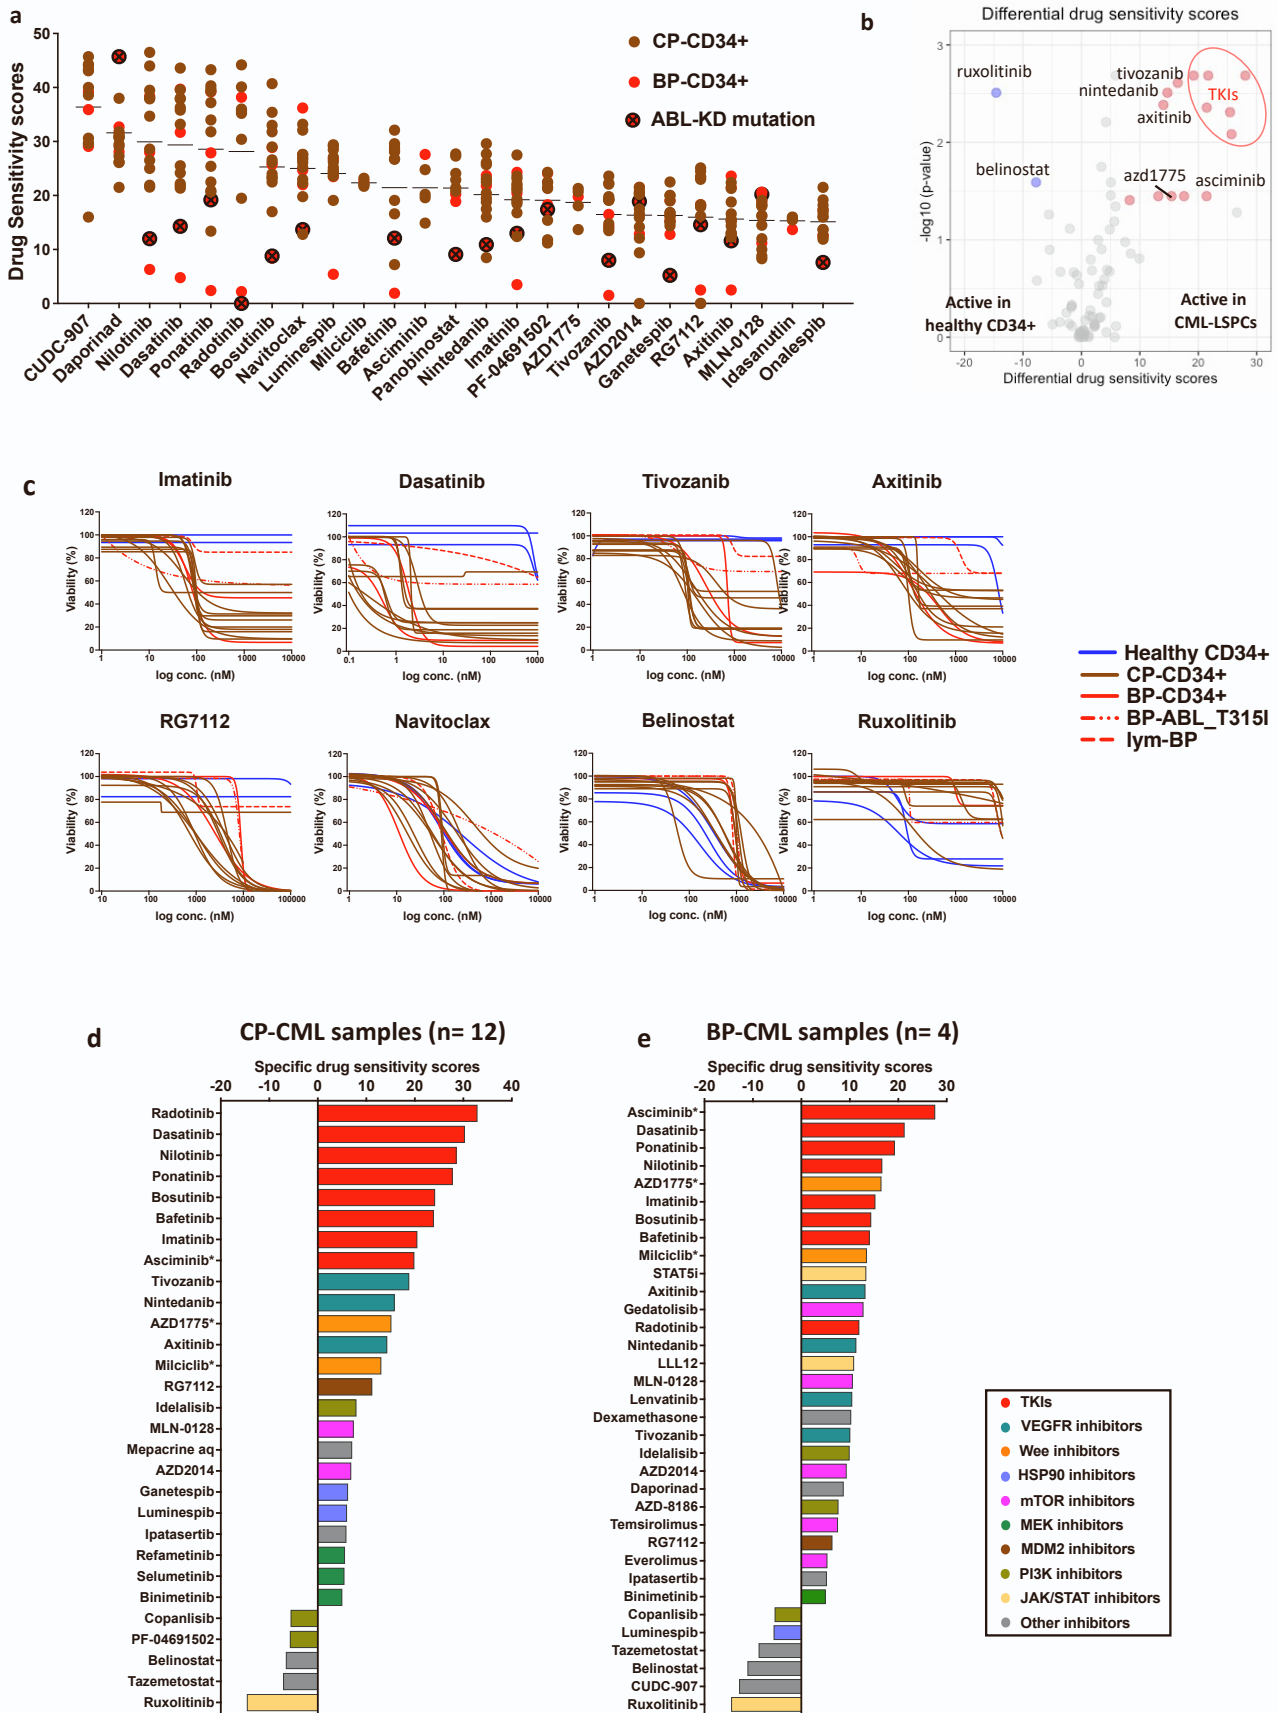

44 **Figure S2: Drug sensitivity profiles of CML-LSPCs.** Related to Figure 1. a) Dot plot showing DSS scores of the top 25  
45 drugs in CML-LSPCs samples (n=16). Each dot represents an individual sample and is colored according to CML phase,  
46 brown for CP and red for AP/BP. Additionally, a BP-patient with ABL T315I mutation is marked with (x). Milciclib,  
47 asciminib, azd1775, idasanutlin were tested in a subset of samples. b) Volcano plot comparing DSS scores of CML-LSPCs  
48 and healthy CD34+ samples. Drugs with significantly higher activity in CML-LSPCs are highlighted in red and those  
49 active in healthy CD34+ are highlighted in blue. TKIs (imatinib, dasatinib, nilotinib, ponatinib, bosutinib, radotinib) are  
50 circled with a red circle in the figure. Comparison of DSS scores is done using non-parametric Mann-Whitney testing. FDR  
51 values (adjusted p-values for multiple comparisons) <0.15 are considered significant. c) Dose response curves showing  
52 response of individual response curves of CP (brown, n=12), BP (red, n=4), and healthy CD34+ (blue, n=3) samples to  
53 selected drugs. BP patient with T315I mutation and lymphoid BP patient curves are marked with different dashed lines.  
54 Bar plot of the differential drug sensitivity of e) CP-LSPCs (n = 12), and f) BP-LSPCs (n=4) compared to healthy CD34+  
55 (n=3). Drugs are colored by their functional classes. (\*) indicates drugs that were tested only in a subset of samples.

56

57

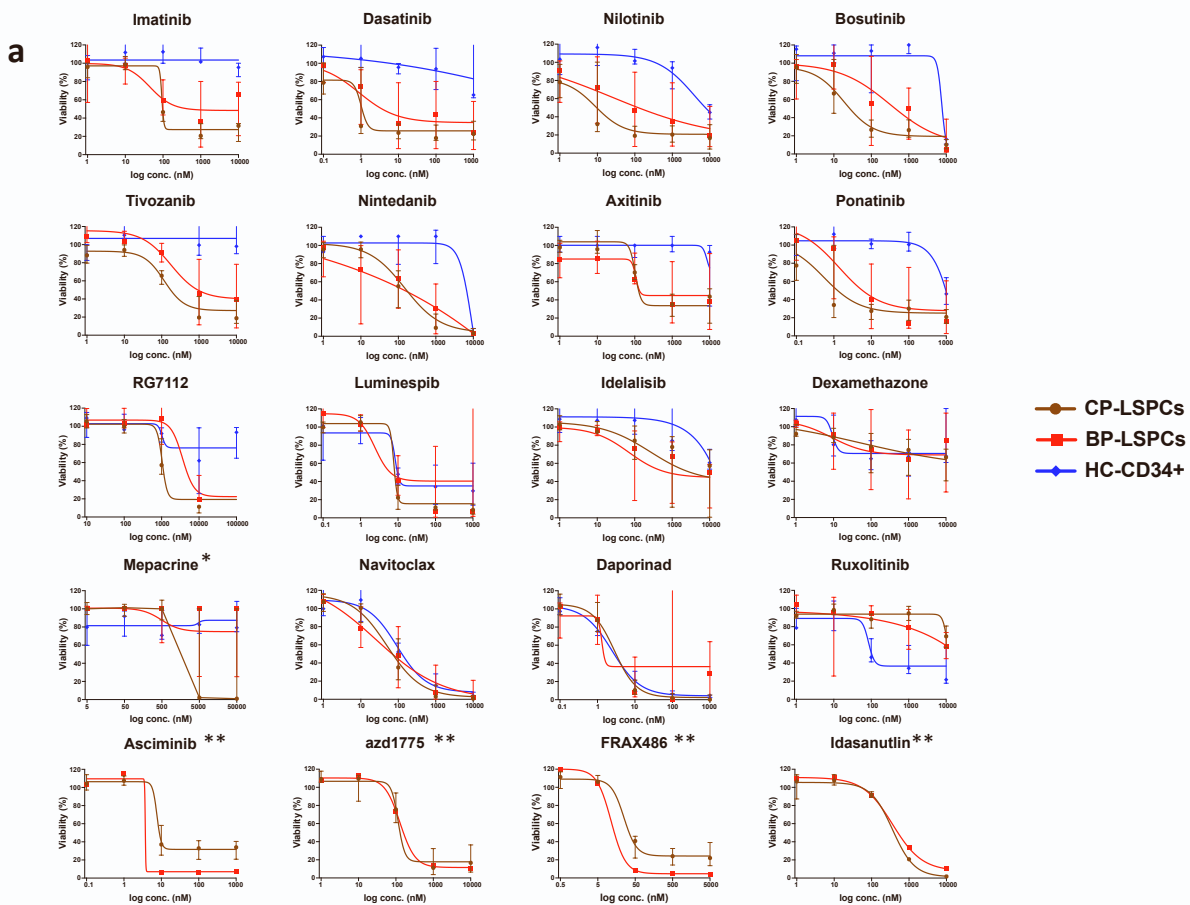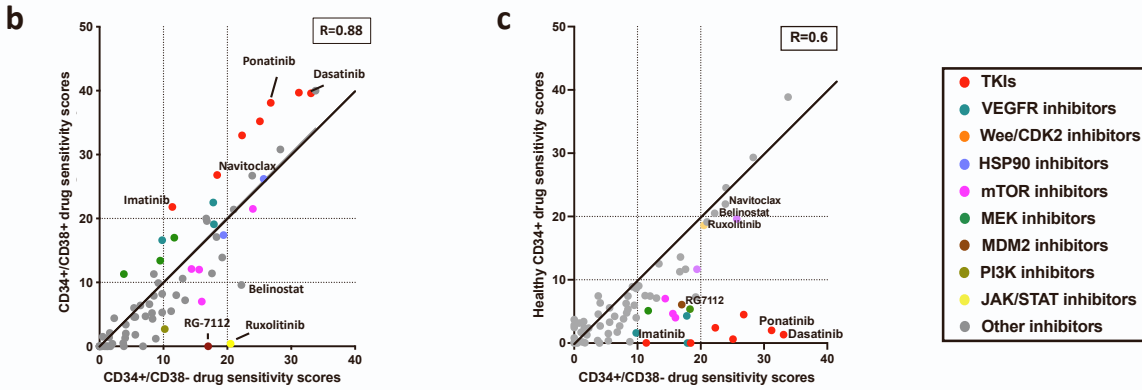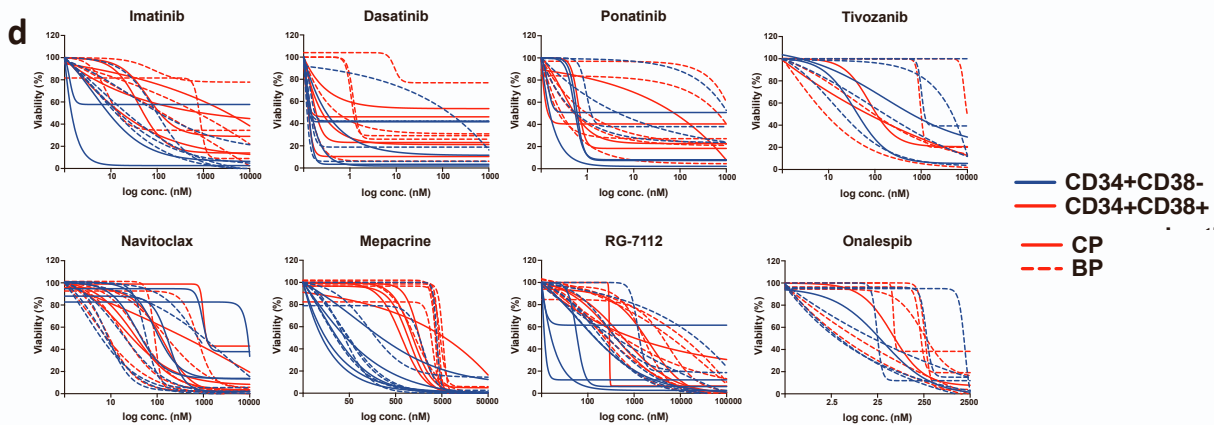

60 **Figure S3: Differential drug activities in CML-LSPCs and healthy CD34+.** Related to Figures 1 and 2. a) Dose response  
61 curves showing response of CP-LSPCs (brown), BP-LSPCs (red), and healthy CD34+ (blue) to 20 drugs. Dots represent  
62 median viability values for each drug concentration and the error bars represent the interquartile ranges. (\*) For mepacrine,  
63 curve fitting model perform poorly in fitting all dose responses in CP-LSPCs. So, a line connecting dose responses was  
64 used instead. (\*\*) indicates drugs that were tested only in a subset of samples. Dot plot showing the correlations of DSS  
65 scores between b) CML-LSCs (CD34+CD38-) and CML-LPCs (CD34+CD38+), and c) CML-LSCs and healthy CD34+  
66 cells. Drugs are colored according to their targeting functional classes as indicated. d) Dose response curves showing  
67 individual responses of LSCs (blue), LPCs (red), of CP patients (solid curves) and BP patients (dashed curves) to the drugs  
68 shown in figure 2b.

69

70



71 **Supplementary Figure 4**

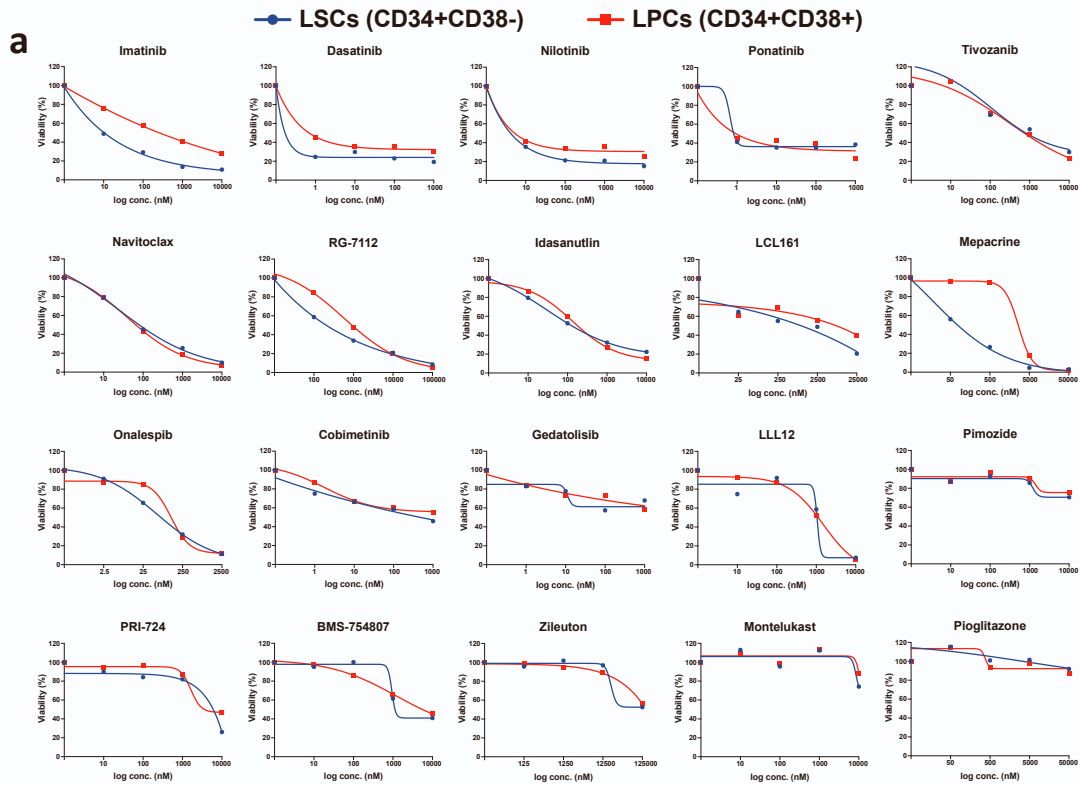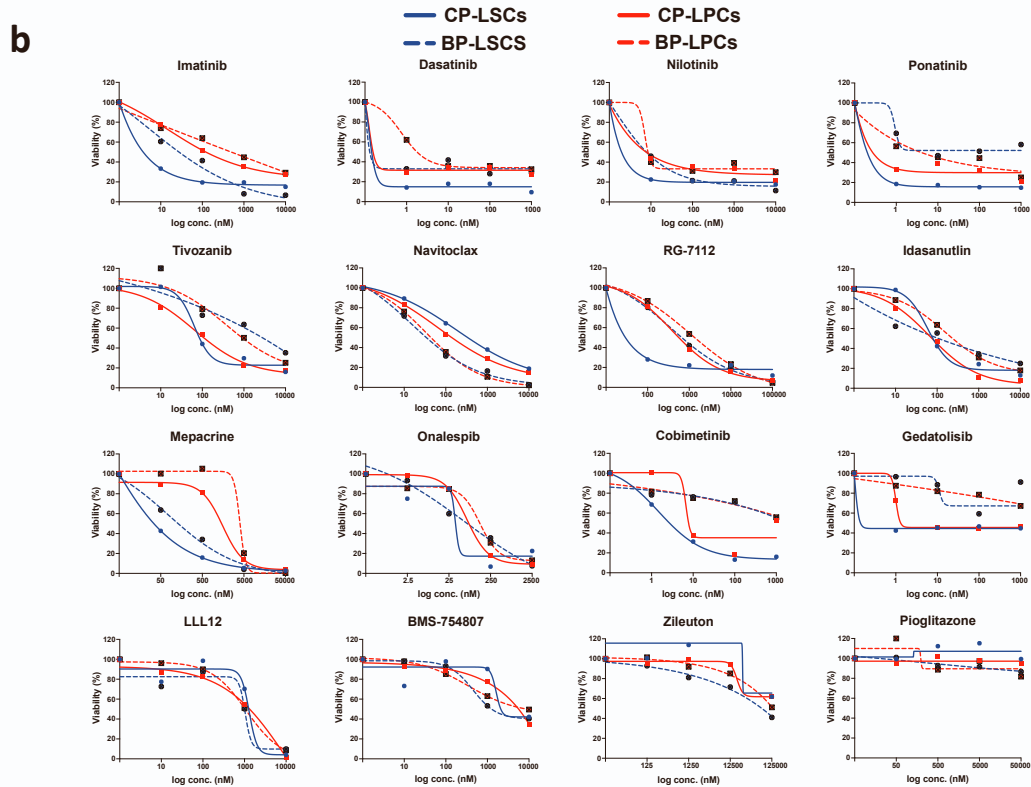

73 **Figure S4: Flowcytometry-based drug sensitivity profiles of CML-LSCs, CML-LPCs.** Related to Figure 2. a) Dose  
74 response curves showing response of LSCs (blue), LPCs (red) from 12 CML patient' samples to 20 drugs. B) Phase specific  
75 dose response curves showing response of LSCs (blue), LPCs (red), of CP patients (n=6, solid curves, and dots) and BP  
76 patients (n=6, dashed curves, x-centered dots) to 16 drugs.

77

78

79 **Supplementary Figure 5**

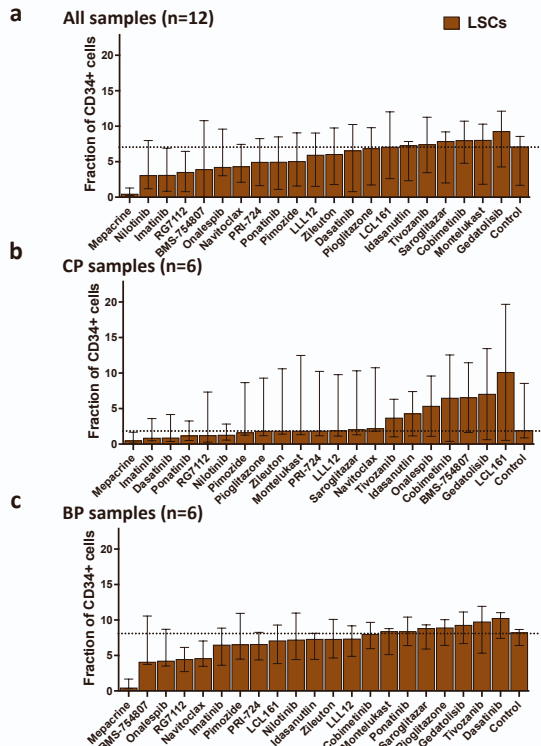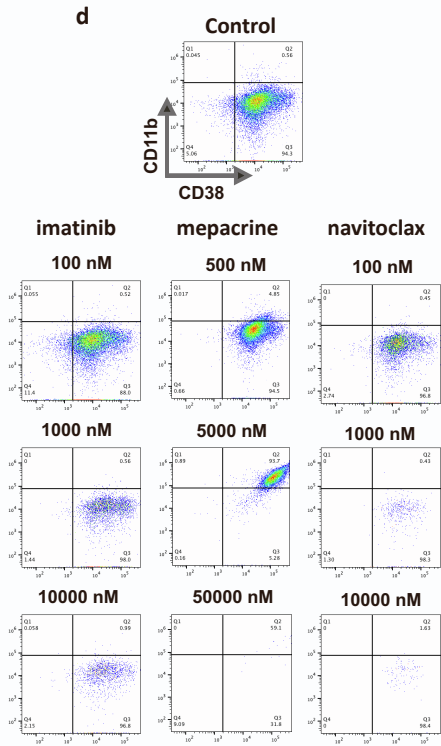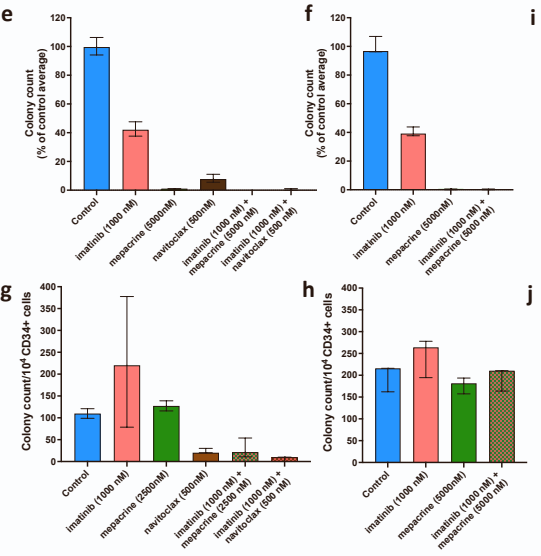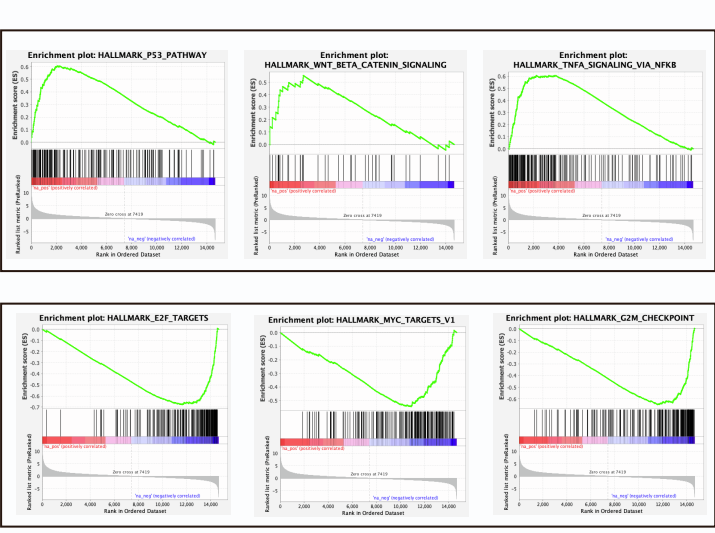

80  
 81 **Figure S5: Flowcytometry-based drug profiling highlights mepacrine’s specific targeting of primitive CML-LSCs.**  
 82 Related to Figure 2. Bar plots showing the response of LSCs (CD34+CD38-) cells to the tested drugs in a) all samples, b)

83 CP samples, c) BP samples. The percentage of LSCs fraction of total CD34+ cells in the 3<sup>rd</sup> concentrations of all tested  
84 drugs are compared to the percentage in control (DMSO) wells. A dashed line indicates the median of control wells. Bar  
85 height represent median values with error bars representing the interquartile range. d) Flowcytometry panels showing the  
86 expression of myeloid differentiation markers CD38 (*x-axis*) and CD11b (*y-axis*) on CD34+ gated cells from imatinib,  
87 mepacrine and navitoclax treated CML cells over 3 log concentrations. e-f) Colony forming assay (CFA) (patient  
88 number=2, each is shown in a separate plot) and g-h) long term culture initiating cells (LTC-IC) assay (patient number=2,  
89 each is shown in a separate plot) of CML-LSPCs in the presence of imatinib, mepacrine and navitoclax as individual drugs  
90 and imatinib-drug combination at the indicated concentrations. Colony count output is expressed as percentage of the drug-  
91 treated conditions from control (dms0-treated) condition in CFA analysis. For LTC-IC the colony count is normalized to  
92 be expressed as colony count per 10<sup>4</sup> input CD34+ LSPCs. Each experiment is done in replicate (replicates are shown  
93 separately in the figure) using 2 different patient samples. A suboptimal mepacrine concentration (2500nM) was used in  
94 the 1<sup>st</sup> LTC-IC experiment (panel g) since the 5000 nM concentration used in CFA (panel e) wiped out all cells. For the 2<sup>nd</sup>  
95 LTC-IC experiment (panel h), the 5000nM mepacrine concentration was used for a shorter overnight incubation period  
96 rather than 48 hours used in the 1<sup>st</sup> experiment. i,j) Pathway enrichment figures showing the enriched pathways from gene  
97 set enrichment analysis (GSEA) from i) upregulated and j) downregulated differentially expressed genes between  
98 mepacrine and DMSO treated CML-LSPCs.

99

100

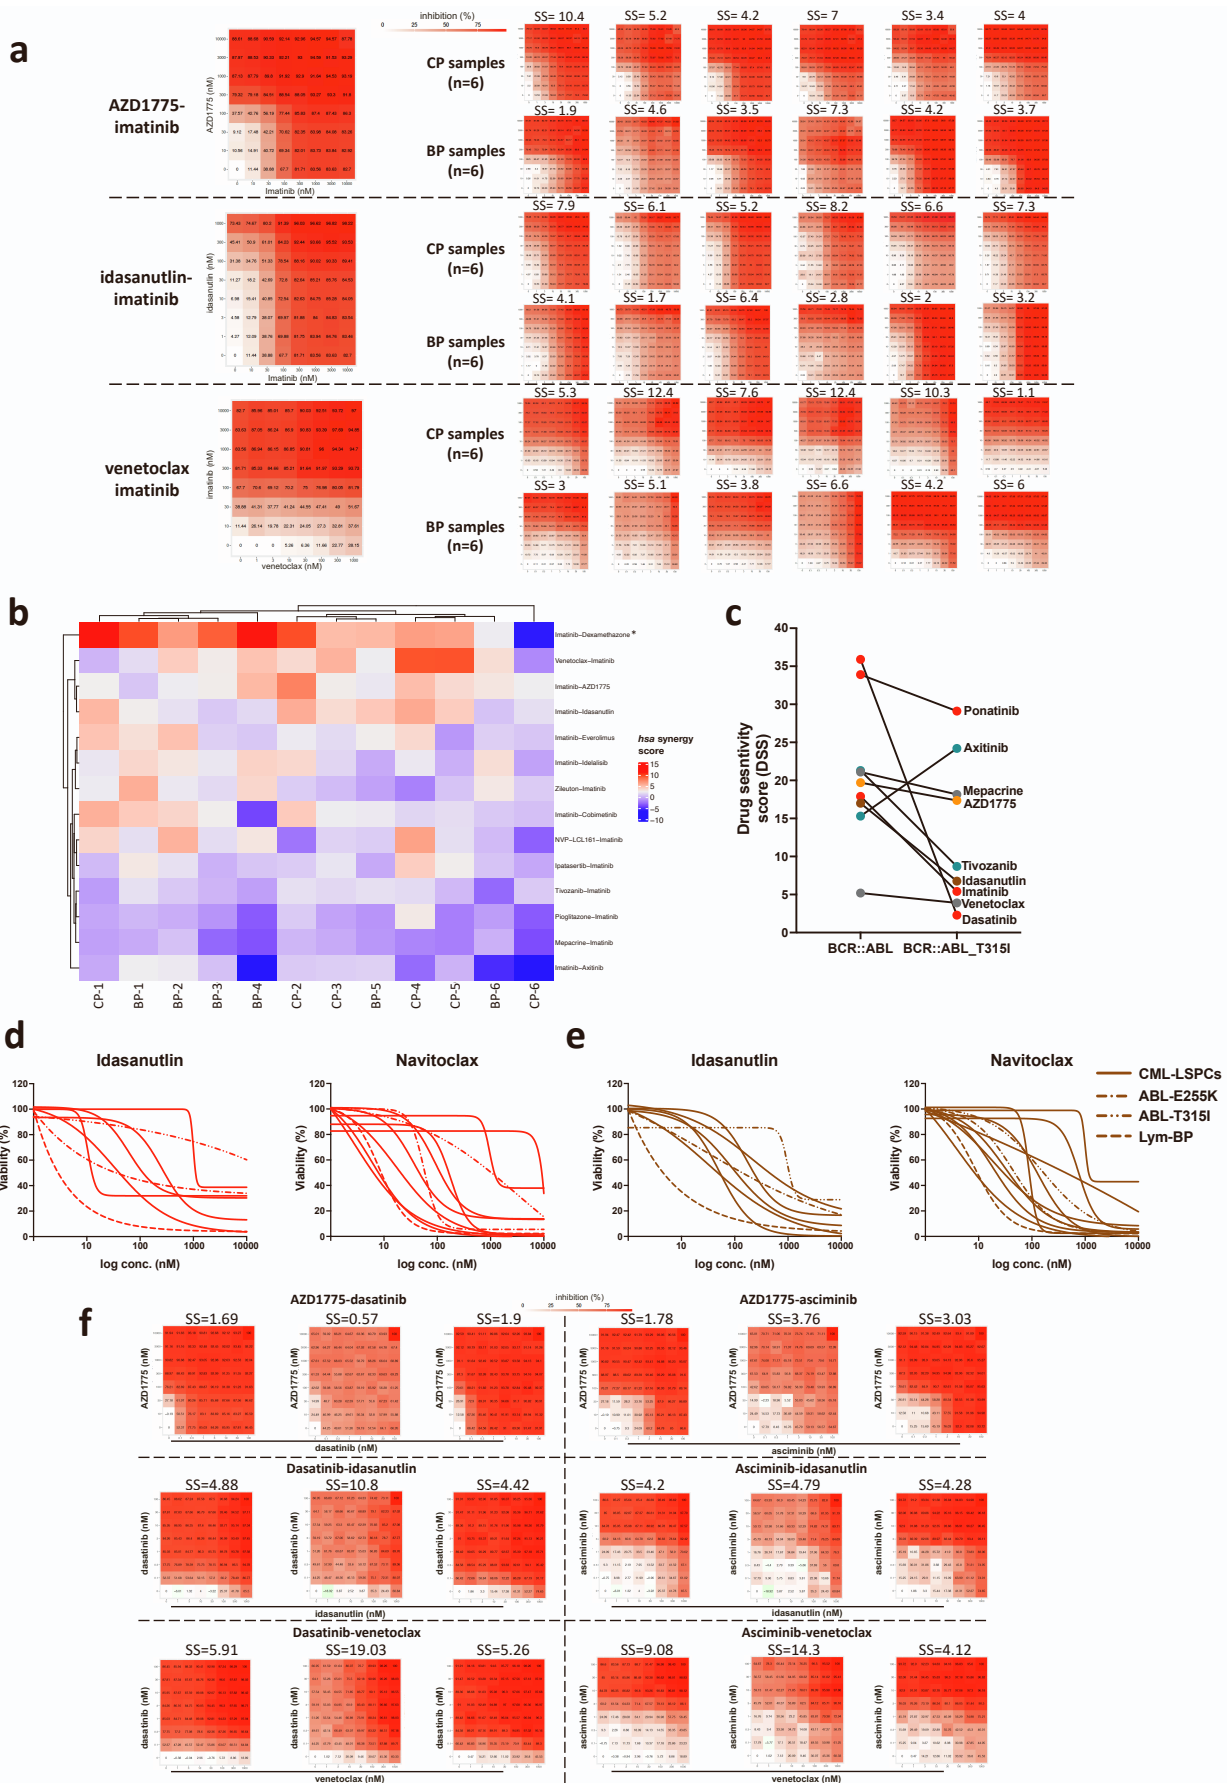

103 **Figure S6: Drug combination screening identified AZD1775, idasanutlin and venetoclax as promising candidates**  
104 **for combinations with TKIs.** Related to Figure 3. a) Heatmaps of dose-combination responses in CML-LSPCs samples,  
105 including 6 BP and 6 CP-LSPCs, for the most synergistic imatinib-drug combinations (AZD1775-imatinib, idasanutlin-  
106 imatinib, venetoclax-imatinib). An example heatmap is shown on the left for each imatinib-drug combination with percent  
107 inhibition values are indicated in the heatmaps. Heatmaps from the 12 individuals are shown on the right with HSA synergy  
108 score indicated on the top of each heatmap. b) Heatmap of synergy scores of 18 imatinib-drug combinations in CML-  
109 LSPCs samples (n=12). Synergy score >5 is considered synergistic, and >10 is highly synergistic. (\*) imatinib-  
110 dexamethasone combination showed universally high synergistic score in all samples, which can be a technical outlier  
111 (dose-response curves seem to converge, suggesting no real synergy). c) Dot plot showing comparison of drug DSS scores  
112 from Ba/f3 cells transduced with either p210 BCR::ABL1 wild type or T315I mutant form. d-e) Dose response curves  
113 showing individual FC-DSRT responses of d) LSCs (red), e) LPCs (brown) of CML patients. Dose response curves of  
114 CML- samples are represented in solid lines, except for BP samples with ABL1-KD mutations (T315I, E255K) and  
115 lymphoid BP patient that are marked with different dotted/dashed curves as indicated. f) Heatmaps of dose-combination  
116 responses in 3 CP-LSPCs samples, for the combinations of AZD1775, idasanutlin, and venetoclax with either dasatinib or  
117 asciminib (examples of second or third line TKIs respectively). Heatmaps from individual samples are shown with percent  
118 inhibition values are indicated in the heatmaps and with HSA synergy score indicated on the top of each heatmap. Synergy  
119 score >5 is considered synergistic, and >10 is highly synergistic.

120

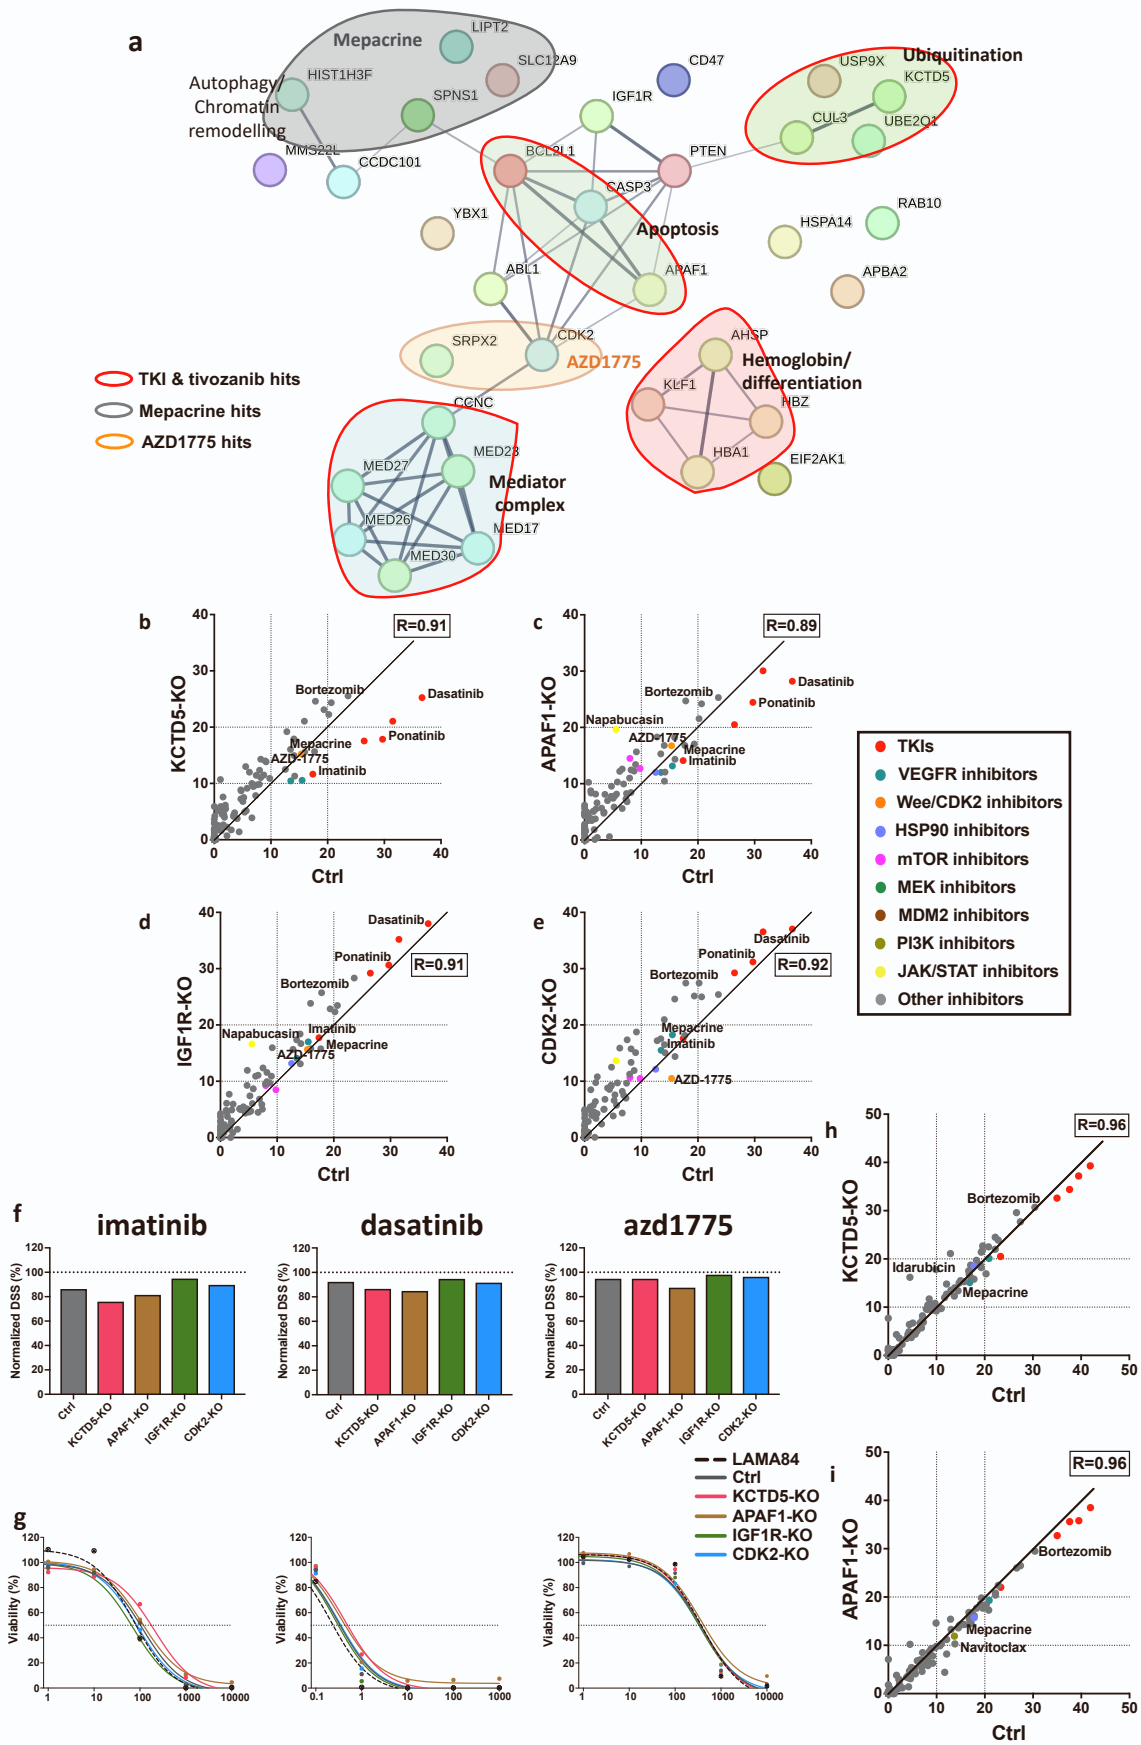

123 **Figure S7: Genome scale CRISPR screening and individual gene CRISPR KO validation in CML cell lines.** Related  
124 to Figures 4 and 5. a) Schematic figure of STRING protein interaction analysis (from the Swiss Institute of Bioinformatics  
125 [<https://string-db.org/>]) of resistance/sensitization hits identified by genome wide CRISPR screens and their connection  
126 with BCR-ABL. We have highlighted pathways enriched with specific drugs. b-e) Dot plot showing the correlations of  
127 DSS scores between control K562 cells (transduced with non-targeting sgRNA) and b) *KCTD5*-KO, c) *APAF1*-KO, d)  
128 *IGFIR*-KO, and e) *CDK2*-KO. All condition were tested in duplicate. Drugs are colored according to their targeting  
129 functional classes as indicated. Correlations were performed using Spearman correlation. f) Bar plots of the drug sensitivity  
130 scores of imatinib, dasatinib and azd1775 in different individual gene-KO LAMA84 cells. DSS scores were obtained from  
131 classic 72-hours DSRT experiments (see Supplemental methods) and were normalized and expressed as percentage of the  
132 drug DSS scores in parental LAMA84 cells (indicated by dashed line). CRISPR/Cas9 expressing LAMA84 cells transduced  
133 with non-targeting gRNA was used as a control (Ctrl). g) Dose-response curves of imatinib, dasatinib, and azd1775  
134 individual gene-KO K562 cells. Dose response curve of the drugs in parental K562 cells are represented by dashed curve.  
135 Viability of the cells at different concentrations is presented as percentage of the viability of dms0 treated wells. A dashed  
136 line indicates 50% viability of cells. h-i) Dot plot showing the correlations of DSS scores between control K562 cells  
137 (transduced with non-targeting sgRNA) and h) *KCTD5*-KO, and i) *APAF1*-KO. Drugs are colored according to their  
138 targeting functional classes as indicated. Data correlations were performed using Spearman correlation test.  
139  
140



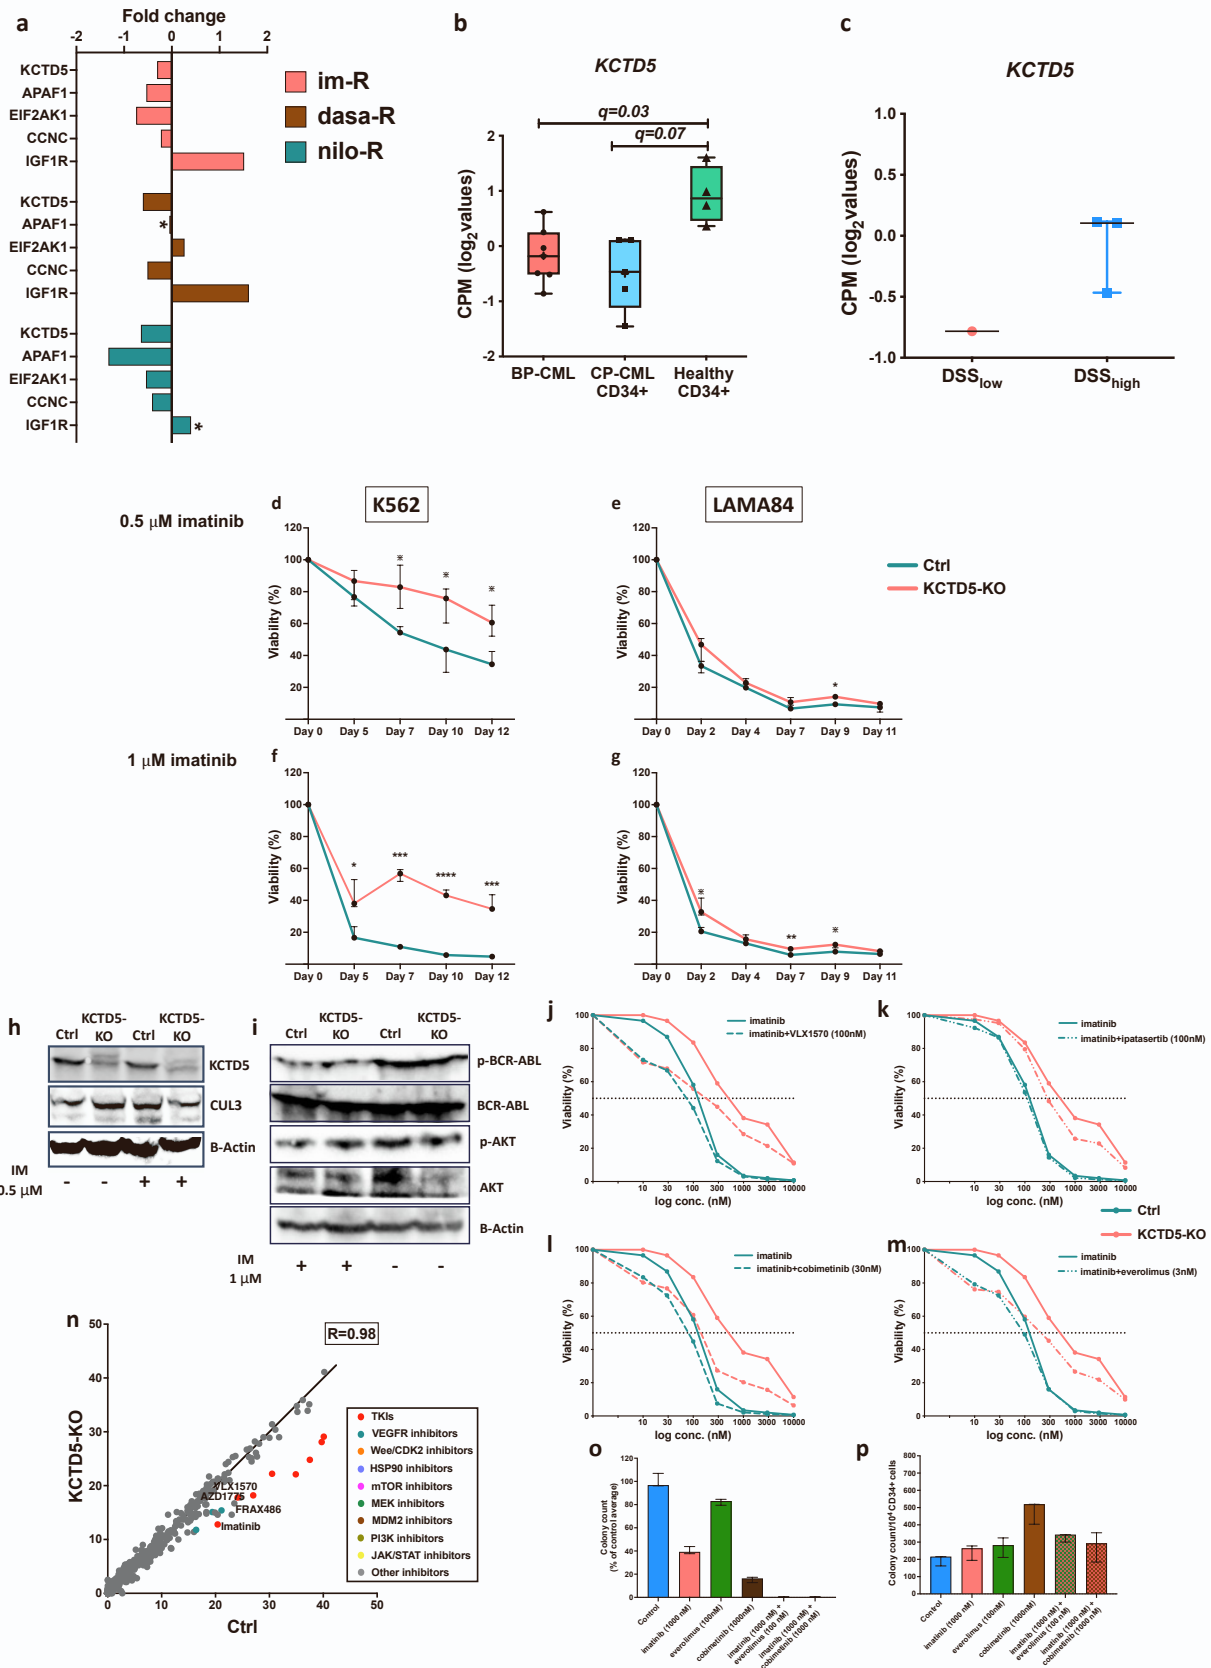

143 **Figure S8: KCTD5-KO confers an imatinib-resistance phenotype through dysregulation of several signaling and**  
144 **protein processing pathways.** Related to Figures 5 and 6. a) Bar plot showing fold changes in the gene expression levels  
145 of *KCTD5*, *APAF1*, *EIF2AK1*, *CCNC* and *IGF1R* genes in imatinib-, dasatinib- and nilotinib-resistant K562 cells from  
146 previously published gene expression data.(2) All changes in the figure were reported as significant ( $q < 0.05$ , calculated  
147 using Cuffdiff tool) except for those marked with (\*). b) Dot plot of the expression values of *KCTD5* gene in previously  
148 published transcriptional data(3) from BP, CP-LSPCs and healthy CD34+ samples (n=7, 5 and 4 respectively). Bar height  
149 represents the interquartile range, the middle line represents median values with error bars representing range. *Q-values*  
150 calculated using Bayesian statistical test. c) Dot plot of the expression values of *KCTD5* gene in previously published  
151 transcriptional data(3) from CP-LSPCs samples, that were subsetted according to imatinib DSS response into DSS-low  
152 (relatively resistant group, DSS <15, n=1) and DSS-high (sensitive group, DSS >15, n=3). The middle line represents  
153 median values with error bars representing range. d-g) Growth curves showing growth of control and KCTD5-KO K562  
154 and LAMA84 cells in presence of different imatinib concentrations. Dots represent median values with error bars  
155 representing 95% of confidence intervals (CI). \*  $p < 0.05$ , \*\*  $p < 0.01$ , \*\*\*  $p < 0.001$ , \*\*\*\*  $p < 0.0001$ , \*  $p < 0.1$  (adjusted *p*  
156 value, multiple unpaired t-test corrected for multiple comparisons). h) Protein levels of KCTD5, CUL3 and B-actin proteins  
157 in untreated and imatinib-treated (0.5  $\mu\text{mol}$ ) control and *KCTD5*-KO K562 cell lysates. The levels of CUL3 demonstrated  
158 1.27-fold increase and 0.44-fold decrease in imatinib-treated control and *KCTD5*-KO samples compared to untreated  
159 control samples respectively by densitometry analysis. Data is from a replicate experiment to confirm findings in Figure  
160 6C. j) Protein levels of BCR-ABL, phosphorylated BCR-ABL (p-BCR-ABL), AKT and phosphorylated AKT (p-AKT)  
161 and B-actin proteins in untreated and imatinib-treated (1  $\mu\text{mol}$ ) control and *KCTD5*-KO K562 cell lysates. Densitometric  
162 analysis revealed elevation of p-AKT levels (normalized to total AKT levels) in *KCTD5*-KO K562 compared to control  
163 K562 cells, with ratios of 1.15 and 1.61 in presence and absence of imatinib respectively. j-k) Dose-response curves of  
164 combinations of imatinib with j) the de-ubiquitinase inhibitor VLX1570 (100 nM), k) the AKT inhibitor ipatasertib  
165 (100nM), l) the MEK inhibitor cobimetinib (30nM) and m) the mTOR inhibitor everolimus (3nM), in control (solid curves)  
166 and *KCTD5*-KO (dashed curves) K562 cells. Viability of the cells at different concentrations is presented as percentage of  
167 the viability compared to DMSO treated wells. A dashed line indicates 50% viability of cells. n) Dot plot showing the  
168 correlations of DSS scores (Pearson correlation) between control K562 cells and *KCTD5*-KO, using a 528-drug library.  
169 Drugs are colored according to their targeting functional classes as indicated. o) CFA and p) LTC-IC assay of CML-LSPCs  
170 in the presence of imatinib (1000 nM), everolimus (100 nM), and cobimetinib (1000 nM) as individual drugs and imatinib-  
171 drug combination at the indicated concentrations. Colony count output is expressed as percentage of the drug-treated  
172 conditions from control (dms-treated) condition in CFA analysis. For LTC-IC the colony count is normalized to be  
173 expressed as colony count per  $10^4$  input CD34+ LSPCs.

174

175

## References

176

177

178

179

1. Pietarinen PO, Eide CA, Ayuda-Durán P, Potdar S, Kuusanmäki H, Andersson EI, et al. Differentiation status of primary chronic myeloid leukemia cells affects sensitivity to BCR-ABL1 inhibitors. *Oncotarget*. 2017 Apr 4;8(14):22606–15. doi: 10.18632/oncotarget.15146.

180

181

182

2. Noel BM, Ouellette SB, Marholz L, Dickey D, Navis C, Yang TY, et al. Multiomic Profiling of Tyrosine Kinase Inhibitor-Resistant K562 Cells Suggests Metabolic Reprogramming To Promote Cell Survival. *J Proteome Res*. 2019 Apr 5;18(4):1842–56. doi: 10.1021/acs.jproteome.9b00028.

183

184

185

3. Adnan Awad S, Kankainen M, Ojala T, Koskenvesa P, Eldfors S, Ghimire B, et al. Mutation accumulation in cancer genes relates to nonoptimal outcome in chronic myeloid leukemia. *Blood Adv*. 2020 Feb 11;4(3):546–59. doi: 10.1182/bloodadvances.2019000943.

186
